# Supplementary material for: Protective Strategies of Haberlea rhodopensis for Acquisition of Freezing Tolerance: Interaction between Dehydration and Low Temperature
Source: MDPI journal article supplement (doi:10.3390/ijms232315050), 2022-11-30
Supplement: s1 [file s1]

*Supplementary material*

# **Protective strategies of *Haberlea rhodopensis* for acquisition of freezing tolerance: interaction between dehydration and low temperature**

**Katya Georgieva <sup>1,\*</sup>, Gergana Mihailova <sup>1</sup>, Beatriz Fernández-Marín <sup>2</sup>, Gianpaolo Bertazza <sup>3</sup>, Annalisa Govoni <sup>3</sup>, Miren Irati Arzac <sup>4</sup>, José Manuel Laza <sup>5</sup>, José Luis Vilas <sup>5</sup>, José Ignacio García-Plazaola <sup>4</sup>, Francesca Rapparini <sup>3</sup>**

<sup>1</sup> Institute of Plant Physiology and Genetics, Bulgarian Academy of Sciences, Acad. G. Bonchev Str., Bl. 21, 1113 Sofia, Bulgaria

<sup>2</sup> Department of Botany, Ecology and Plant Physiology, University of La Laguna (ULL), 38200 Tenerife, Spain

<sup>3</sup> Bioeconomy Institute (IBE), Department of Bio-Agrifood Science (DiSBA), National Research Council (CNR), Via P. Gobetti 101, I-40129 Bologna, Italy

<sup>4</sup> Department of Plant Biology and Ecology, University of the Basque Country (UPV/EHU), Barrio Sarriena s/n, 48940 Bilbao, Spain

<sup>5</sup> Department of Physical Chemistry, University of the Basque Country (UPV/EHU), Barrio Sarriena s/n, 48940 Bilbao, Spain

\* Correspondence: georgieva.katya.m@gmail.com; Tel.: +359-2-979-2620

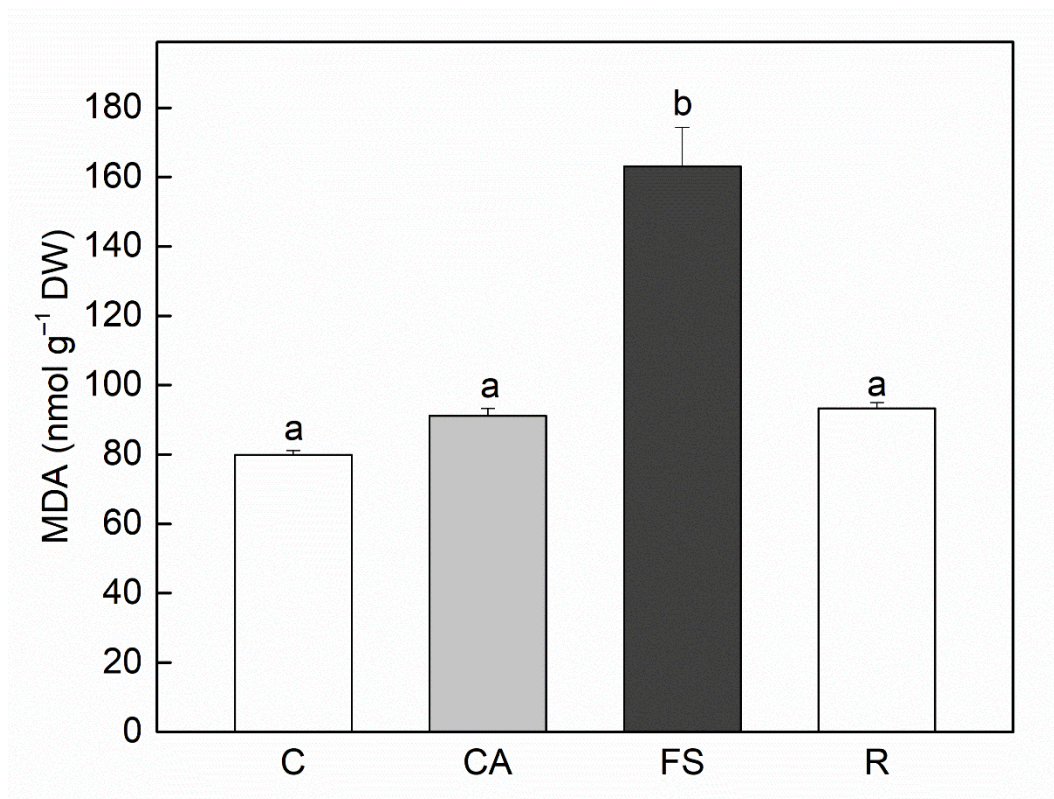

**Figure S1.** Changes in malondialdehyde (MDA) content during cold acclimation of *Haberlea rhodopensis* (CA, 2 weeks at 5 °C), after exposure to -10 °C for 12 h (FS) and 24 h recovery at day/night temperature of 20/15 °C (R) under temperature-controlled conditions. Data represent the mean of  $n = 12$ . The same letters within a graph indicate no significant differences assessed by Fisher's LSD test ( $p \leq 0.05$ ) after performing ANOVA.

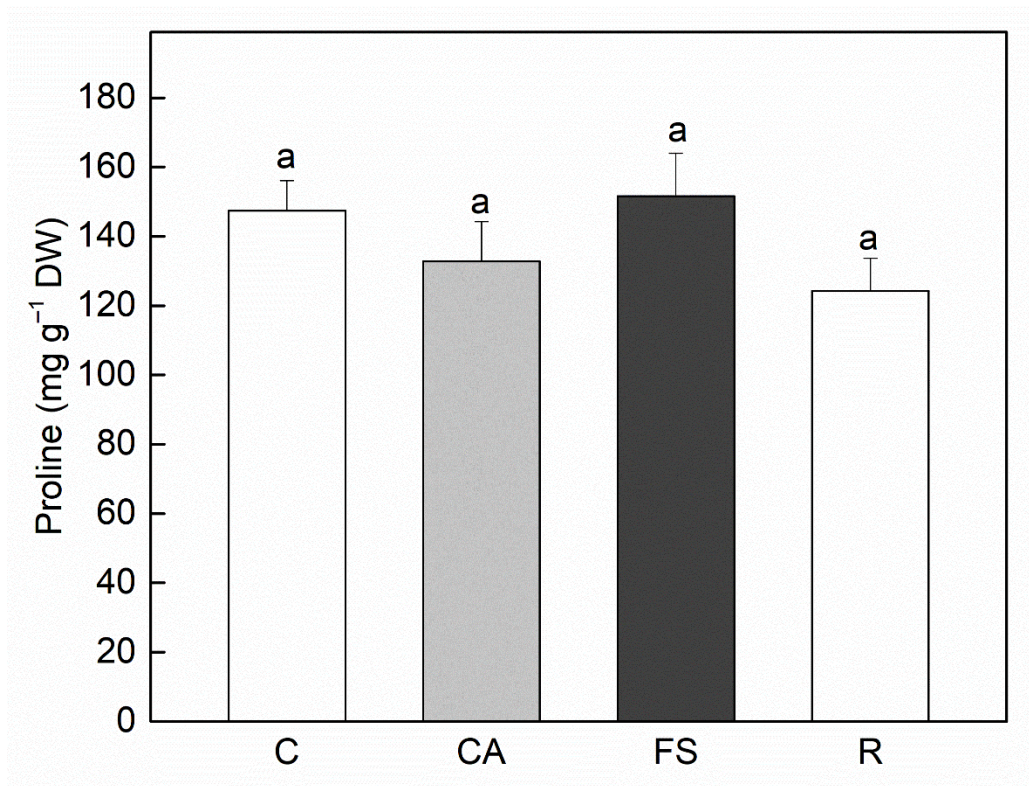

**Figure S2.** Changes in proline content during cold acclimation of *Haberlea rhodopensis* (CA, 2 weeks at 5 °C), after exposure to -10 °C for 12 h (FS) and 24 h recovery at day/night temperature of 20/15 °C (R) under temperature-controlled conditions. Data represent the mean of  $n = 12$ . The same letters within a graph indicate no significant differences assessed by Fisher's LSD test ( $p \leq 0.05$ ) after performing ANOVA.

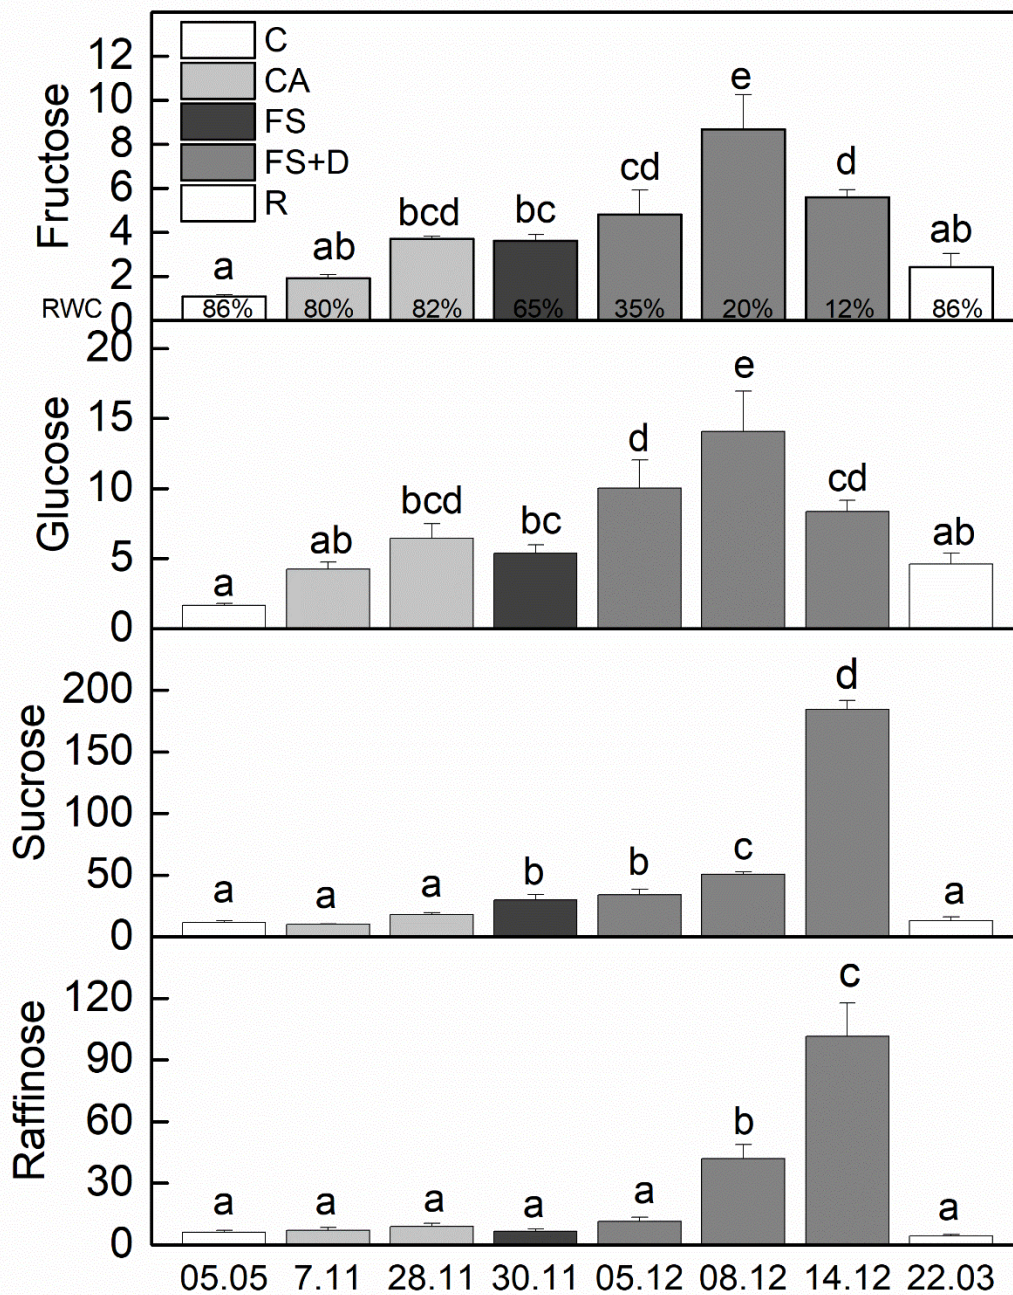

**Figure S3.** Changes in the content of fructose, glucose, sucrose and raffinose ( $\text{mg g}^{-1}$  DW) after exposure to low temperatures during cold acclimation (CA, period: 07–28 November), freezing stress (FS,  $-10^{\circ}\text{C}$ , 30 November), freezing-induced desiccation (FS+D, period: 05–14 December) and after recovery of *H. rhodopensis* in early spring (R; period: 22 March) under natural ex situ environmental conditions. Percentages at the bottom of the columns show the RWC of plants at each sampling point. Data represent the mean of  $n = 4$ . The same letters within a graph indicate no significant differences assessed by Fisher's LSD test ( $p \leq 0.05$ ) after performing ANOVA.

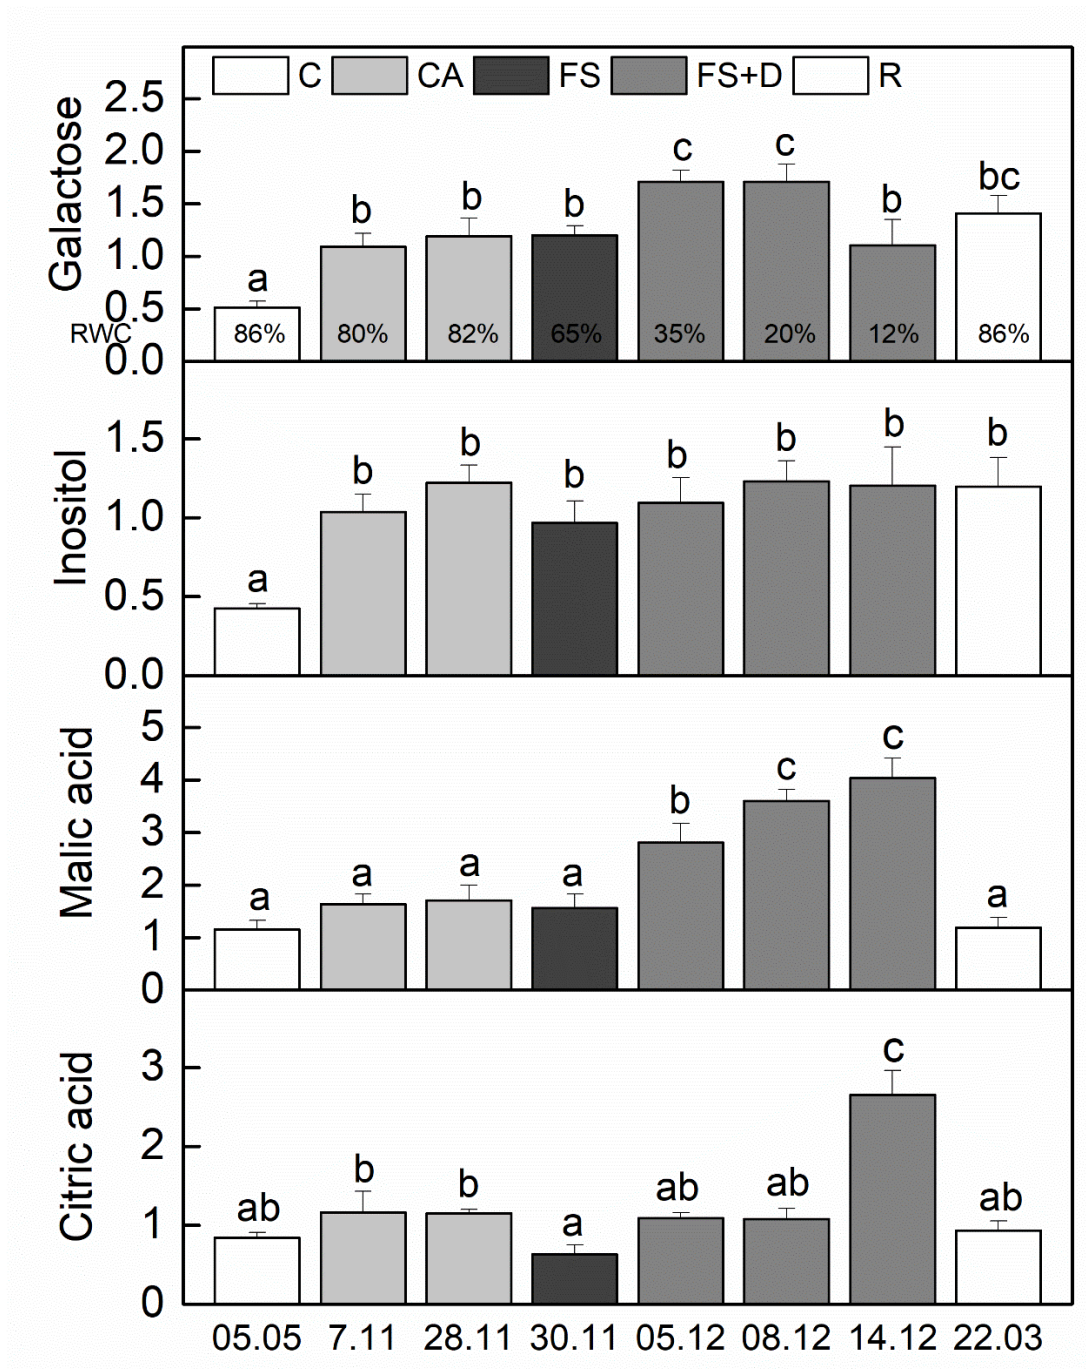

**Figure S4.** Changes in the content of galactose, inositol, malic and citric acids ( $\text{mg g}^{-1}$  DW) after exposure of *Haberlea rhodopensis* to low temperatures during cold acclimation (CA, period: 07–28 November), freezing stress (FS,  $-10^\circ\text{C}$ , 30 November), freezing-induced desiccation (FS+D, period: 05–14 December) and after recovery of plants in early spring (R; period: 22 March) under natural ex situ environmental conditions. Percentages at the bottom of the columns show the RWC of plants at each sampling point. Data represent the mean of  $n = 4$ . The same letters within a graph indicate no significant differences assessed by Fisher's LSD test ( $p \leq 0.05$ ) after performing ANOVA.

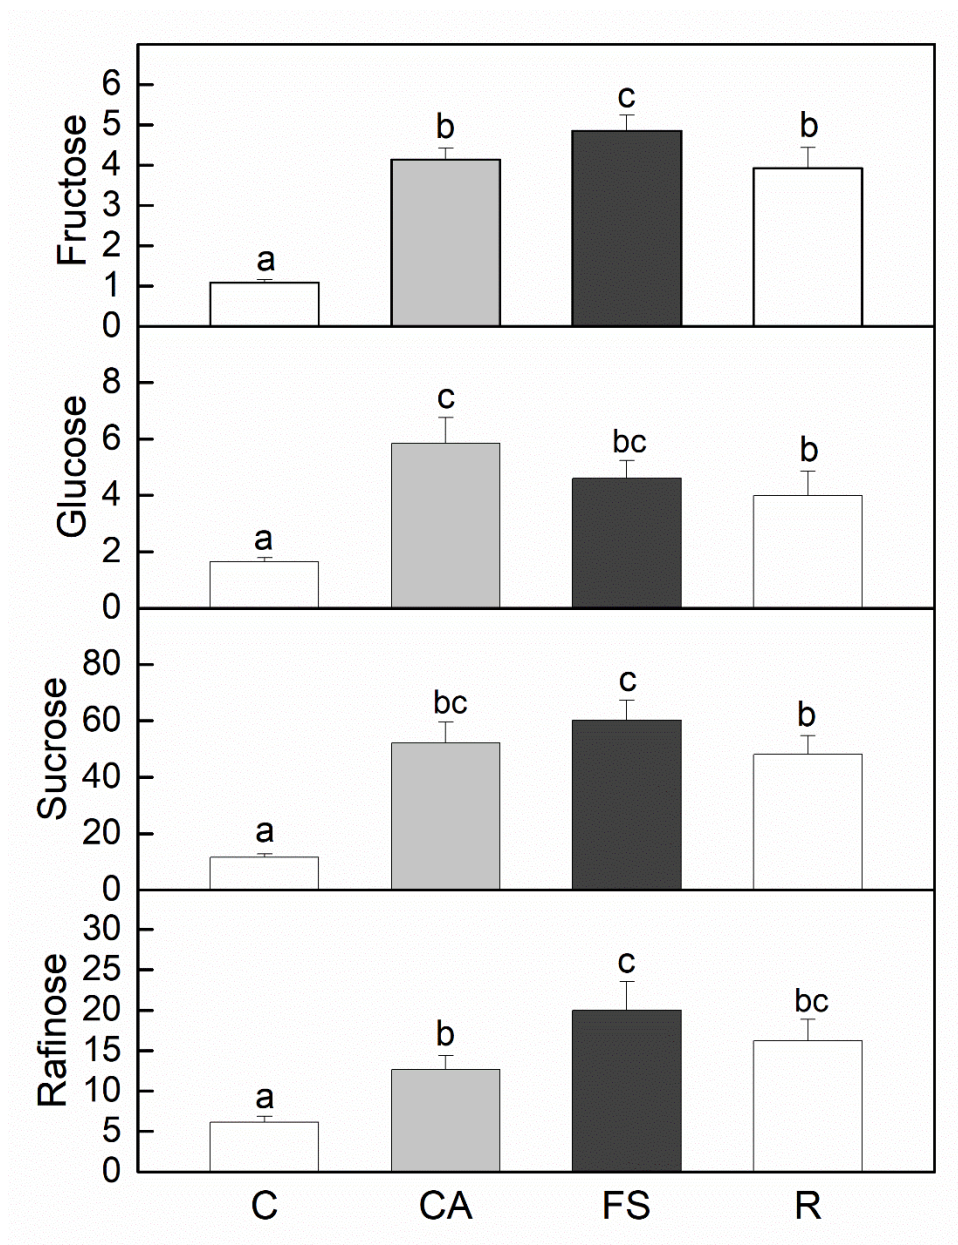

**Figure S5.** Changes in the content of fructose, glucose, sucrose and raffinose (mg g<sup>-1</sup> DW) after cold acclimation of *Haberlea rhodopensis* (CA, 2 weeks at +5 °C), exposure to -10 °C for 12 h (FS) and 24 h recovery at day/night temperature of 20/15 °C (R) under temperature-controlled conditions. Data represent the mean of  $n = 12$ . The same letters within a graph indicate no significant differences assessed by Fisher's LSD test ( $p \leq 0.05$ ) after performing ANOVA.

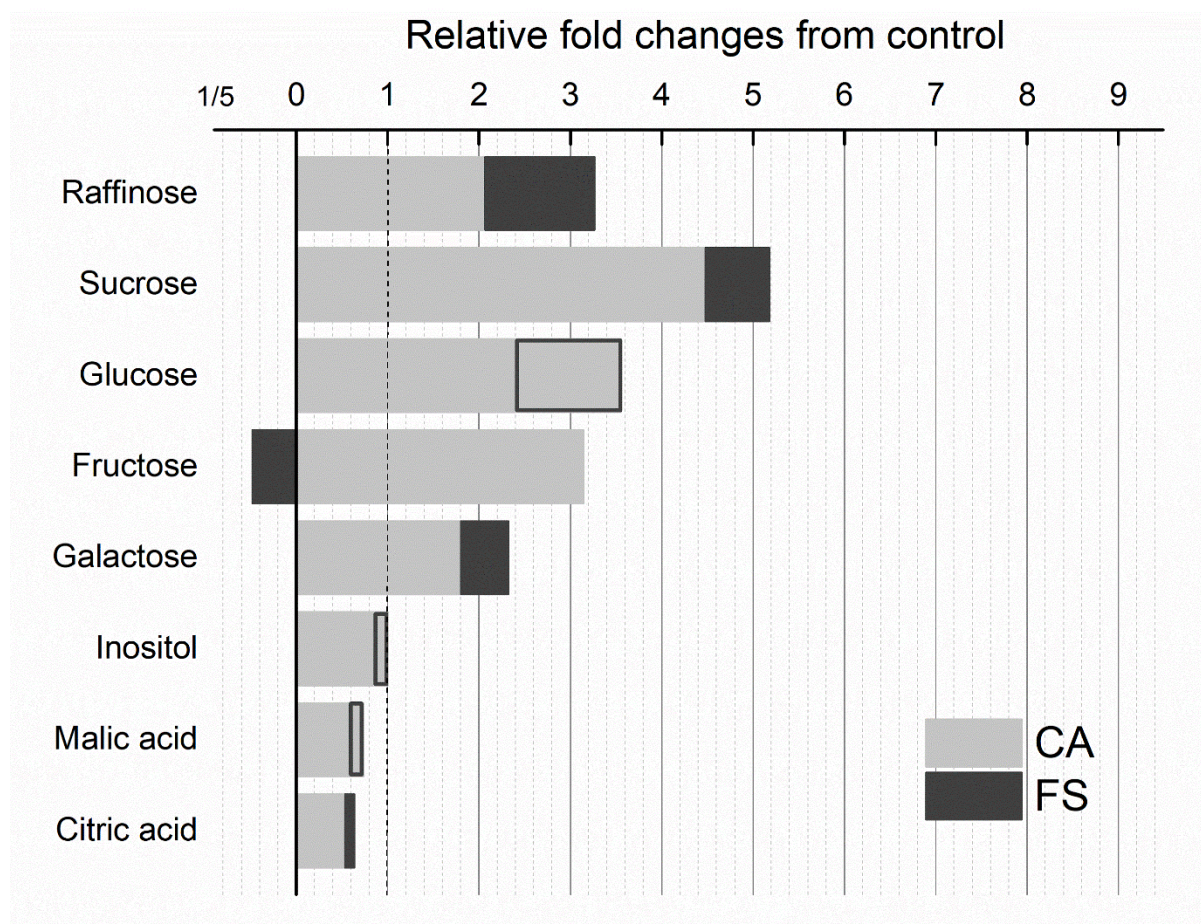

**Figure S6.** Changes in mean concentration of carbohydrates and organic acids measured in leaves of *Haberlea rhodopensis* from the Control under temperature-controlled conditions. Light grey bars indicate changes between Control and cold acclimation (CA; at +5 °C for 2 weeks). Dark grey bars indicate changes from CA to short-term exposure to freezing temperatures (FS; exposure to -10 °C for 12 h). The bars for compounds for which the trend between one phase was opposed to that observed during the precedent transition have only the grey outlines.

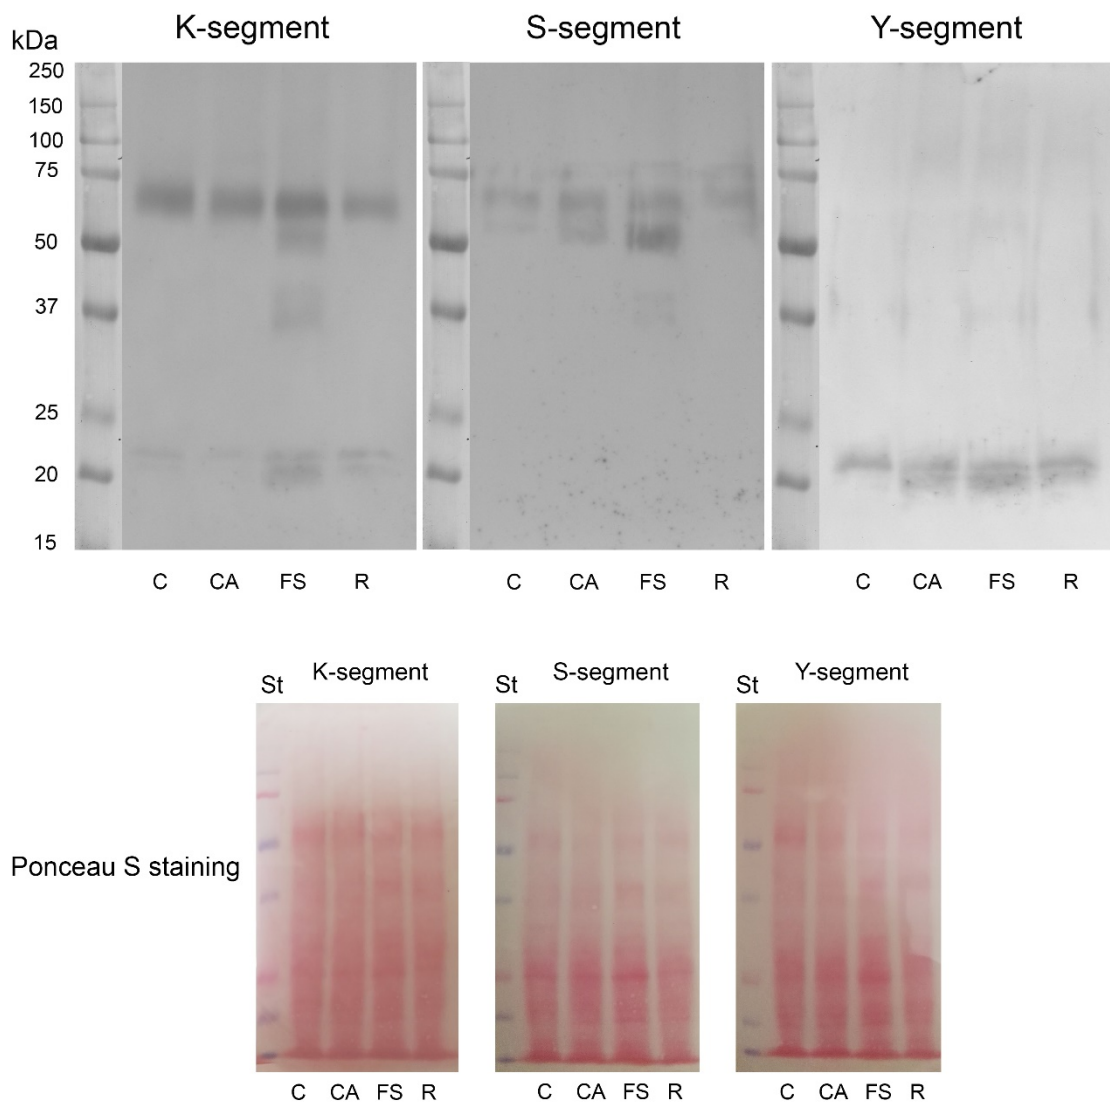

**Figure S7.** Representative Western blots of dehydrins (top) after cold acclimation of *Haberlea rhodopensis* (CA, 2 weeks at 5 °C), exposure to -10 °C for 12 h (FS) and 24 h recovery at day/night temperature of 20/15 °C (R) under temperature-controlled conditions by Western blot using antibodies against the conserved K-, S- and Y-segment of the proteins. 30 µg protein was applied per lane. The Ponceau S staining (bottom) of the membranes after blotting are presented below the Western blots. St: Precision Plus Dual Color Protein™ Prestained Standards (Bio-Rad, Hercules, CA, USA).

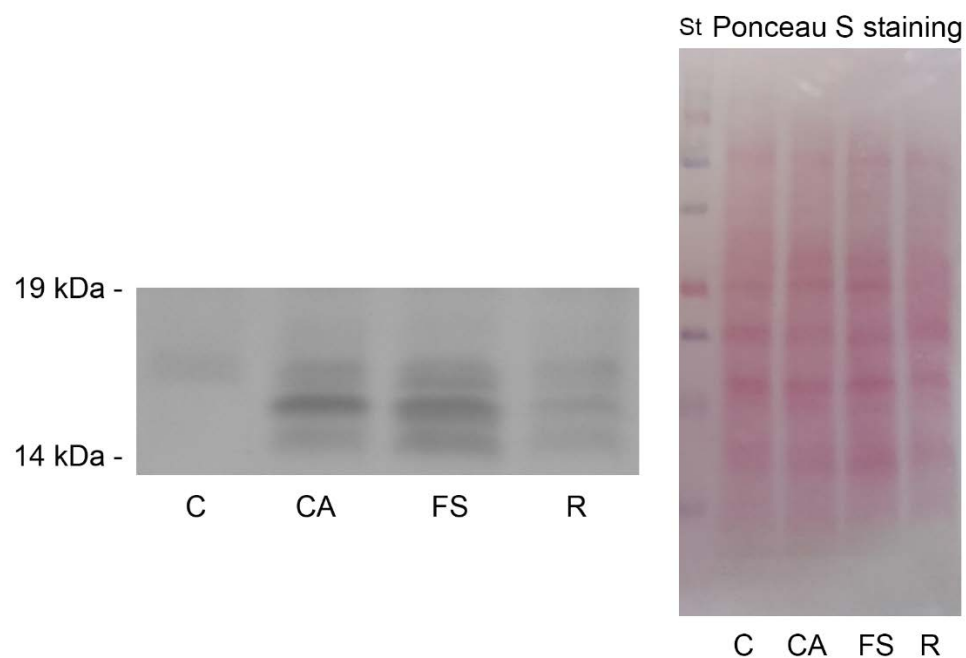

**Figure S8.** Representative Western blots of ELIPs (left) after cold acclimation of *Haberlea rhodopensis* (CA, 2 weeks at 5 °C), exposure to -10 °C for 12 h (FS) and 24 h recovery at day/night temperature of 20/15 °C (R). 30 µg protein was applied per lane. The Ponceau S staining (right) of the membrane after blotting is presented on the right. St: Precision Plus Dual Color Protein™ Prestained Standards (Bio-Rad, Hercules, CA, USA).

**Table S1.** Fatty acid composition after cold acclimation of *Haberlea rhodopensis* (CA, 2 weeks at 5 °C), exposure to -10 °C for 12 h (FS) and 24 h recovery at day/night temperature of 20/15 °C (R) under temperature-controlled conditions. Data represent the mean of *n* = 6. The same letters within a graph indicate no significant differences assessed by Fisher's LSD test (*p* ≤ 0.05) after performing ANOVA.

| Fatty acid         | Control        | CA             | FS            | R              |
|--------------------|----------------|----------------|---------------|----------------|
| Palmitic (16:0)    | 40.36 ± 1.54b  | 37.48 ± 2.90ab | 35.25 ± 1.04a | 38.47 ± 2.41ab |
| Palmitoleic (16:1) | 0.34 ± 0.01ab  | 0.26 ± 0.08a   | 0.51 ± 0.06c  | 0.42 ± 0.03bc  |
| Stearic (18:0)     | 28.81 ± 1.63ab | 34.80 ± 2.70c  | 23.99 ± 2.37a | 29.80 ± 2.78bc |
| Oleic (18:1)       | 12.87 ± 1.56b  | 6.05 ± 0.86a   | 12.58 ± 2.48b | 12.12 ± 1.75b  |
| Linoleic (18:2)    | 12.51 ± 1.43a  | 10.75 ± 1.36a  | 17.39 ± 1.22b | 11.74 ± 2.24a  |
| Linolenic (18:3)   | 4.20 ± 0.48a   | 9.72 ± 1.64b   | 9.25 ± 0.83b  | 6.48 ± 1.69a   |
| Arachidic          | 0.53 ± 0.07a   | 0.64 ± 0.23ab  | 0.95 ± 0.04b  | 0.71 ± 0.26ab  |
| Behenic (22:0)     | 0.28 ± 0.05b   | 0.30 ± 0.10b   | 0.09 ± 0.01a  | 0.26 ± 0.06b   |

**Table S2.** Sampling points, daily maximum and minimum temperature data for experiments in natural (ex situ) and under controlled conditions.

| ex situ natural conditions |          |           |            |            |            |           |           |           |            |           |           |
|----------------------------|----------|-----------|------------|------------|------------|-----------|-----------|-----------|------------|-----------|-----------|
| date                       | 5.5.2016 | 7.11.2016 | 17.11.2016 | 28.11.2016 | 30.11.2016 | 1.12.2016 | 5.12.2016 | 8.12.2016 | 14.12.2016 | 30.1.2017 | 22.3.2017 |
| Variant                    | C        | CA        | CA         | CA*        | FS**       | FS+D      | FS+D      | FS+D      | FS+D       | FS+D      | R         |
| RWC (%)                    | 86       | 80        | 80         | 82         | 65         | 55        | 35        | 20        | 12         | 10        | 86        |
| Min Temp (°C)              | 12       | 13        | 2          | -2         | -9         | -1        | -5        | -3        | -4         | -11       | 6         |
| Max Temp (°C)              | 23       | 23        | 6          | 9          | -2         | 3         | 6         | 4         | 3          | -2        | 22        |
| Mean Temp (°C)             | 17.5     | 18        | 4          | 3.5        | -5.5       | 1         | 0.5       | 0.5       | -0.5       | -6.5      | 14        |

| Controlled climatic chamber |         |         |      |      |
|-----------------------------|---------|---------|------|------|
| Variant                     | C       | CA*     | FS** | R    |
| RWC (%)                     | 91      | 90      | 86   | 89   |
| Min Temp (°C)               | 15      | 5       | -9   | 15   |
| Max Temp (°C)               | 20      | 5       | -11  | 20   |
| Mean Temp (°C)              | 17.5    | 5       | -10  | 17.5 |
|                             | 2 weeks | 2 weeks | 12 h | 24 h |

|      |                                |
|------|--------------------------------|
| C    | Control                        |
| CA   | Cold acclimated                |
| FS   | Freeezing stress               |
| FS+D | Freeezing stress + dehydration |
| R    | Recovery                       |

|  |          |
|--|----------|
|  | >10°C    |
|  | 6-10°C   |
|  | 0-5°C    |
|  | -5/0°C   |
|  | -10/-5°C |

Similar conditions between natural and controlled experiments after CA

\*

\*\*

short-term exposure to temperature of - 10°C
